# Supplementary material for: NLRP3 Inflammasome Activation Controls Vascular Smooth Muscle Cells Phenotypic Switch in Atherosclerosis
Source: MDPI journal article supplement (doi:10.3390/ijms23010340), 2021-12-29
Supplement: s1 [file s1]

**Supplementary Materials:** The following are available online at [www.mdpi.com/xxx/s1](http://www.mdpi.com/xxx/s1),

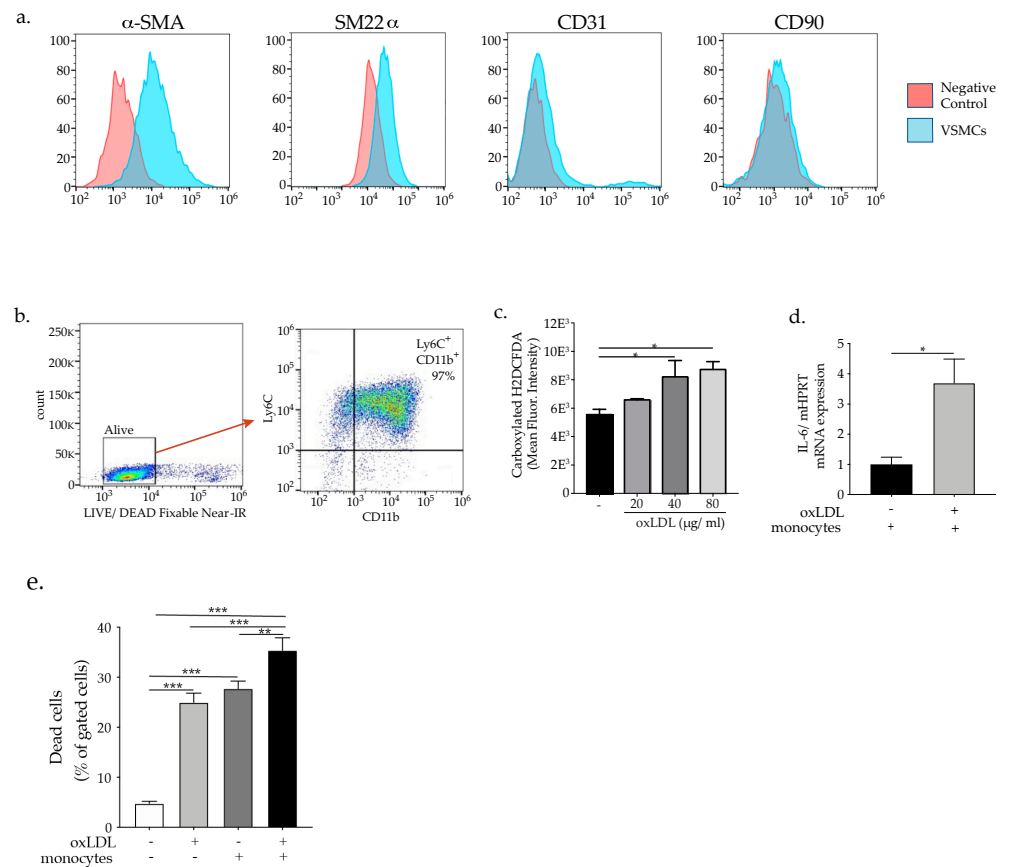

**Figure S1:** (a) Histograms represent the express of VSMC-specific markers  $\alpha$ -SMA, SM22 $\alpha$ , and negative expression of endothelial cells marker CD31 and fibroblast marker CD90 in the isolated mouse VSMC. (b) Mouse monocytes purity check-up. (c) Dose dependent ROS production in oxLDL-activated monocytes. Graph bars represent the mean  $\pm$  SEM of mean fluorescent intensity of carboxylated H2DCFDA mouse monocytes with  $n = 6$ /group and  $*p < 0.05$ , One-way ANOVA. (d) Graph bars represent the mean  $\pm$  SEM of mRNA expression of IL-6 in monocytes or oxLDL-activated monocytes, as indicated, with  $n = 6$ /group and  $*p < 0.05$ , unpaired t-test. (e) Graph bars represent the mean  $\pm$  SEM of Propidium Iodide/7-AAD expressing VSMCs as a percentage of gated VSMCs as indicated, with  $n = 6$ /group,  $**p < 0.01$ ,  $***p < 0.001$ , One-way ANOVA.

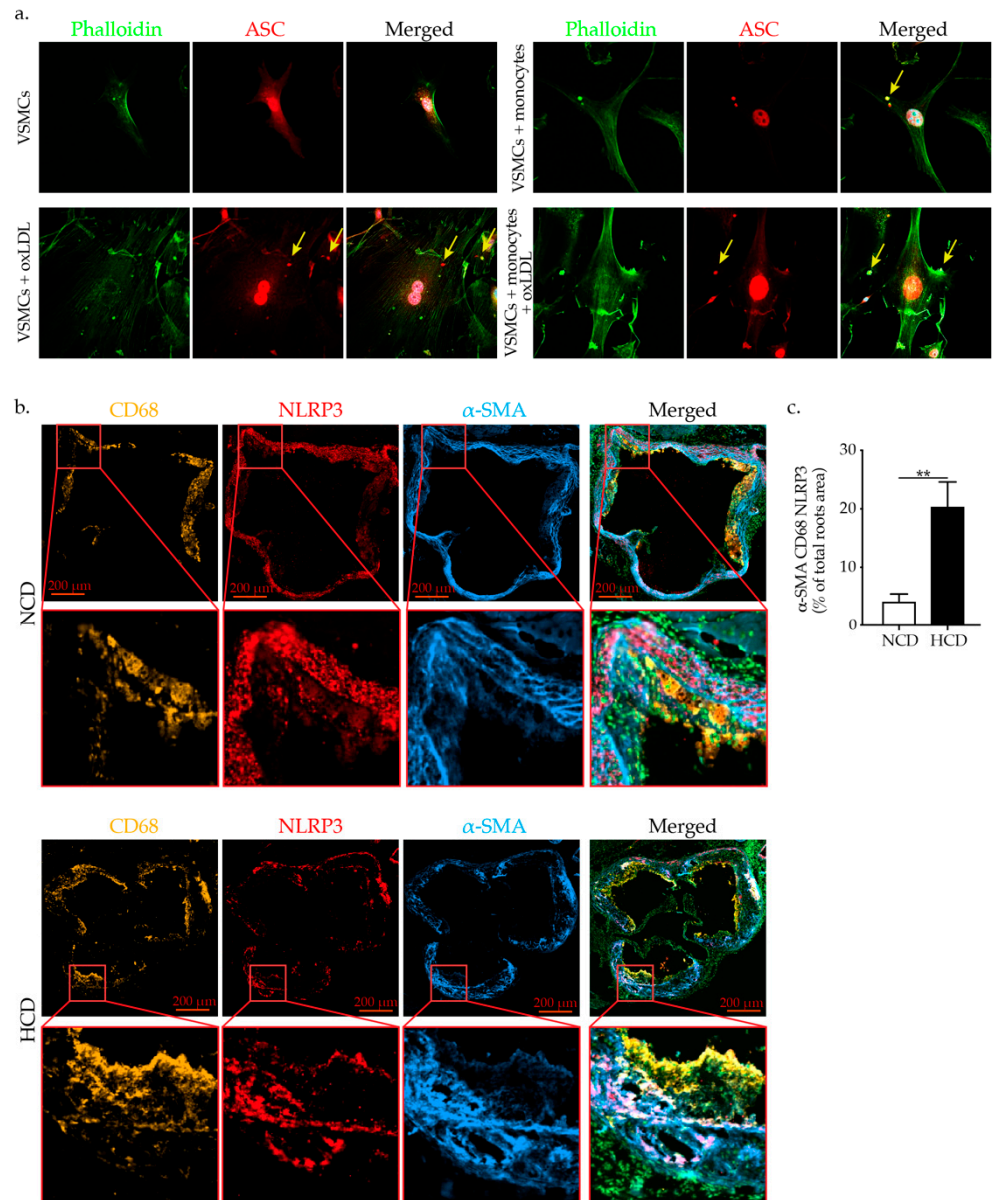

Figure S2: (a) NLRP3 Inflammasome Activation in VSMCs. (a) ASC speck formation (yellow arrow) by confocal microscopy (LSM 800 Airyscan) and immunofluorescence imaging in VSMCs treated with oxLDLs or co-cultured with monocytes or oxLDL-activated monocytes. (b) CD68, NLRP3,  $\alpha$ -SMA in the aortic roots of *Apoe*<sup>-/-</sup> mice fed NCD or HCD. (c) Graph bars show the mean  $\pm$  SEM of CD68, NLRP3,  $\alpha$ -SMA co-expression in the aortic roots plaques of *Apoe*<sup>-/-</sup> mice fed NCD or HCD, n=8/group and \*\*p<0.01, unpaired t-test.
